# Supplementary material for: Fear Appeals in Anti-Knife Carrying Campaigns: Successful or Counter-Productive?
Source: PubMed Central journal article supplement (PMC9679559; doi:10.1177/08862605211064237), 2022-01-17

← Tweet

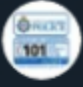

West Yorkshire Police ✓

@WestYorksPolice

Work to tackle knife crime is always ongoing and daily work is done throughout the communities of West Yorkshire – particularly in schools to educate young people about the risks of carrying a knife.

Find out more at: [westyorkshire.police.uk/news-appeals/k...](http://westyorkshire.police.uk/news-appeals/k...)  
[#StopKnifeCrime](https://twitter.com/hashtag/StopKnifeCrime)

# #StopKnifeCrime

[www.westyorkshire.police.uk/stopknifecrime](http://www.westyorkshire.police.uk/stopknifecrime)

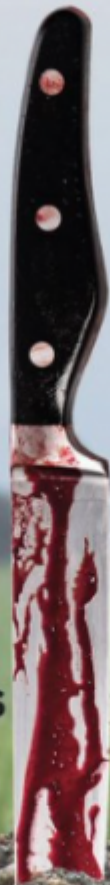

## KNIVES TAKE LIVES

If you carry a knife you risk being sent to prison and increase your chance of being seriously injured or killed

FOR POLICE  
NON-EMERGENCIES

☎ **101**

IN AN EMERGENCY  
ALWAYS CALL 999

Deaf or speech impaired

West Yorkshire & Harrogate

Office of the

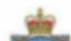

WEST YORKSHIRE

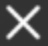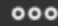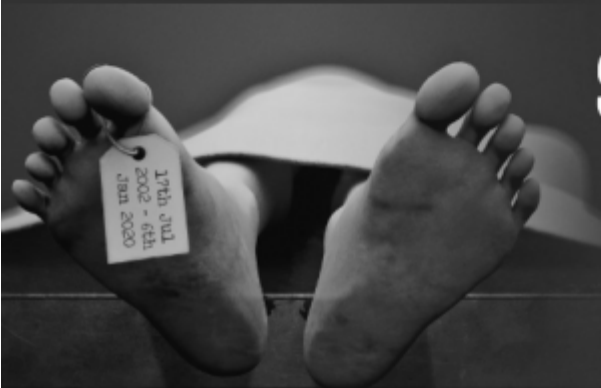

**SON, BROTHER,  
NEPHEW.  
KILLED BY HIS  
OWN KNIFE.**

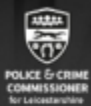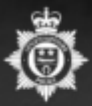

**Leicestershire  
Police**  
Protecting our communities

**Choose life.  
Choose #LivesNotKnives**

 Katie Hudson, Children and Young Person's Officer

 3

 15

 23

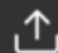

Tweet your reply

**IF YOU CARRY  
A KNIFE YOU'RE  
MORE LIKELY  
TO GET STABBED  
YOURSELF.**

Home Office

2

1

2

1

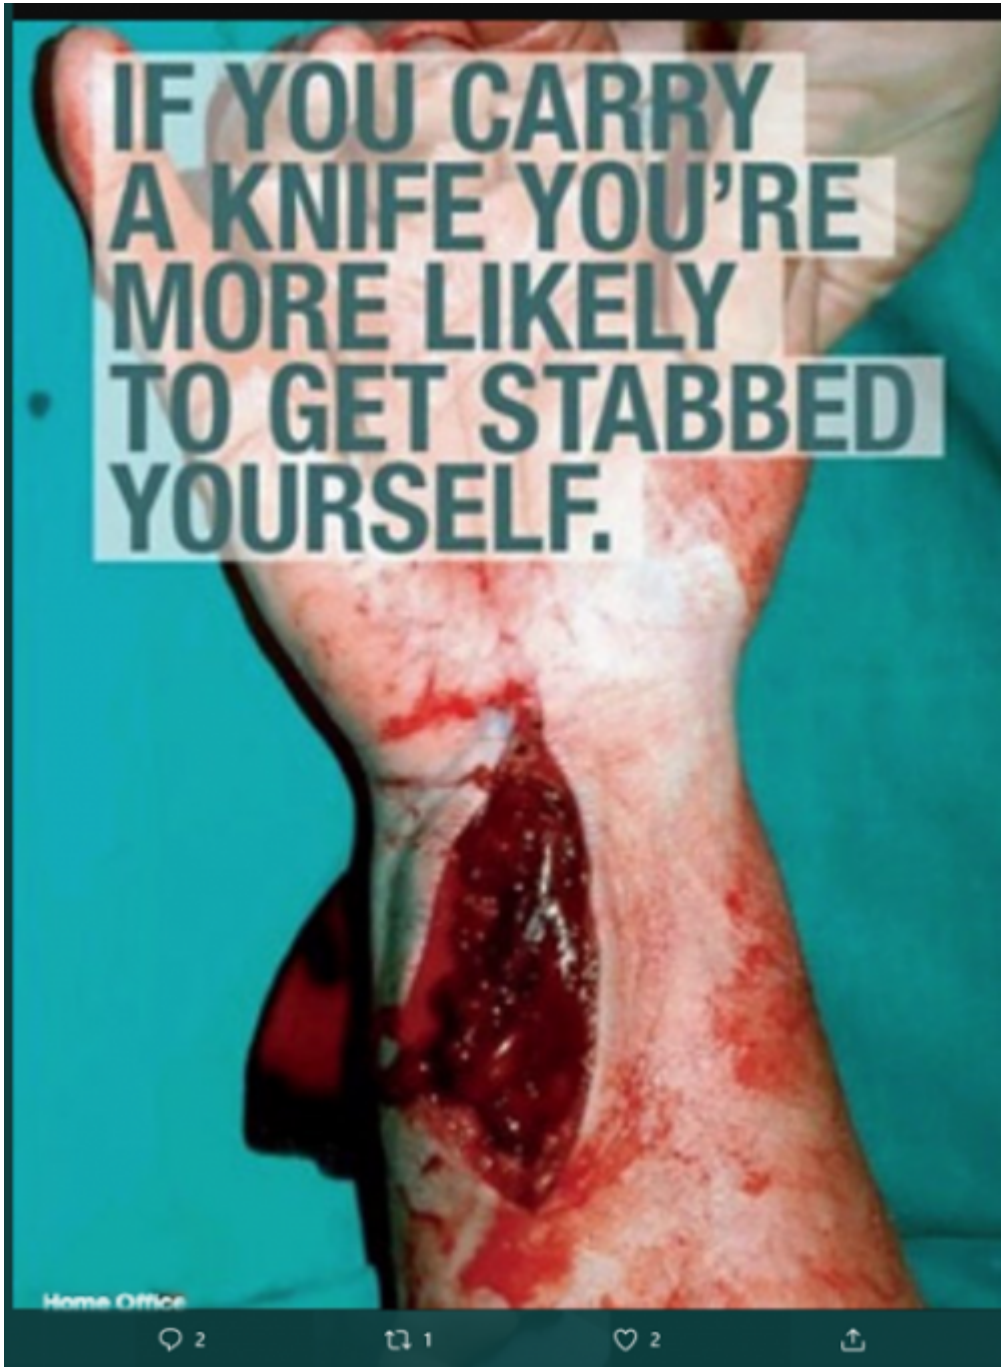

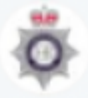

**Notts Knife Crime** @NottsKnifeCrime · 14 Mar 2019

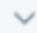

Those carrying knives are statistically far more likely to be victims themselves of knife crime – often with their own knife they were carrying. Speak to your family members if you have concerns about them carrying a knife

[#LivesNotKnives](#) [#opsceptre](#)

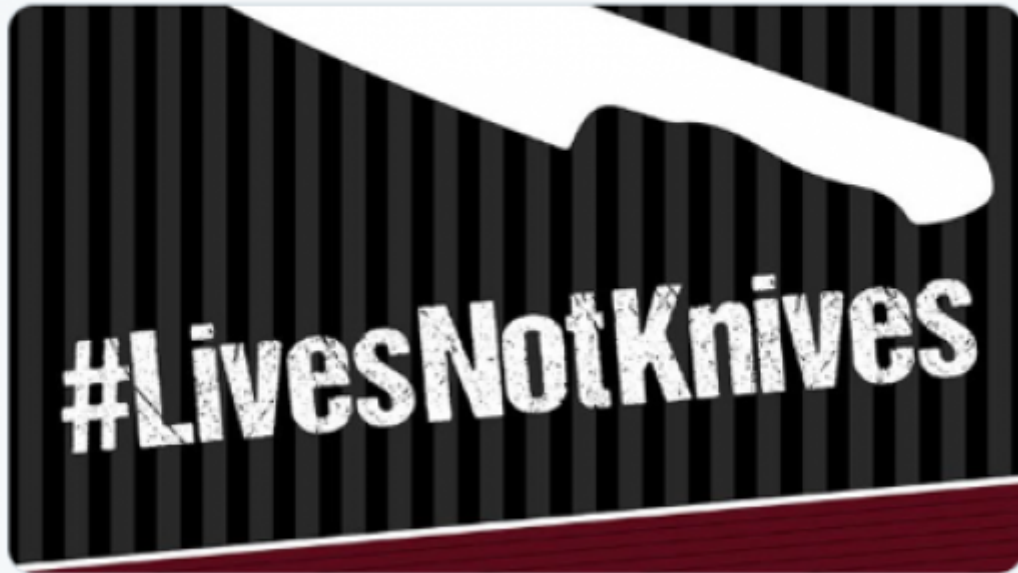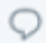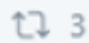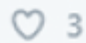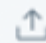

## Sugary drinks swaps

From

To

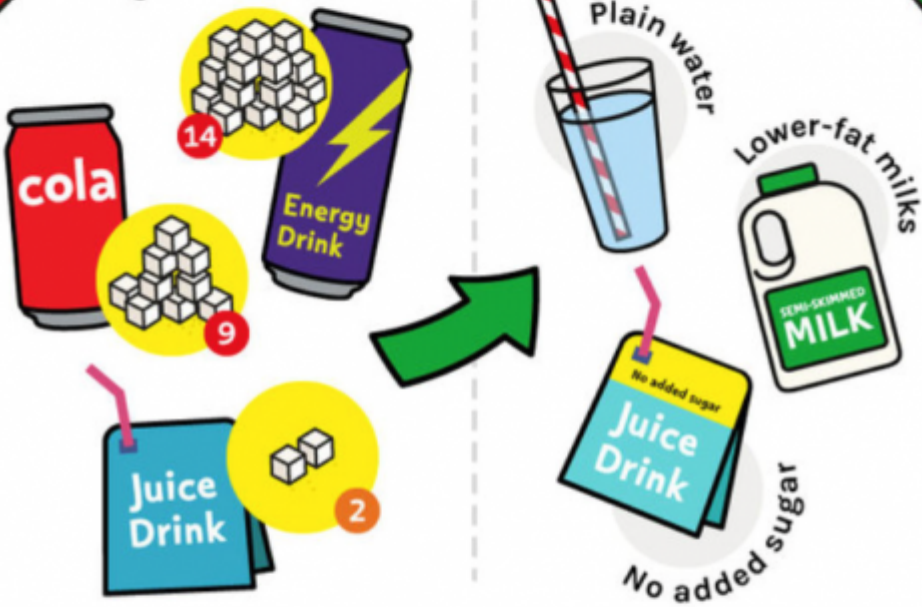

Maximum daily amounts of added sugar

1 cube = 4g

4-6 Years

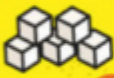

5

5 cubes  
(19 grams)

7-10 Years

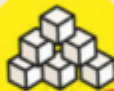

6

6 cubes  
(24 grams)

11+ Years

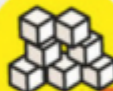

7

7 cubes  
(30 grams)

change 4 life



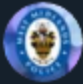

**West Midlands Police** ✓  
@WMPolice

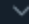

Installing the latest [#SoftwareUpdates](#) is a quick and effective way to secure your      against cyber criminals. Have you got the latest updates?

For more info, visit [ow.ly/K3sR50yqodr](https://ow.ly/K3sR50yqodr)

#SoftwareUpdates

actionfraud.police.uk/cybercrime

**Software updates**  
**keep the cyber**  
**criminals out**

**UPDATE ↓**

Cyber criminals use weaknesses in software to attack your devices and steal your identity. Software and app updates are designed to fix these weaknesses and installing them as soon as possible will keep your devices secure.

**ActionFraud**  
National Fraud & Cyber Crime Reporting Centre  
www.actionfraud.police.uk

9:01 am · 24 Feb 2020 · Hootsuite Inc.

2 Retweets 6 Likes

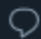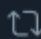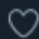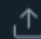

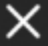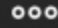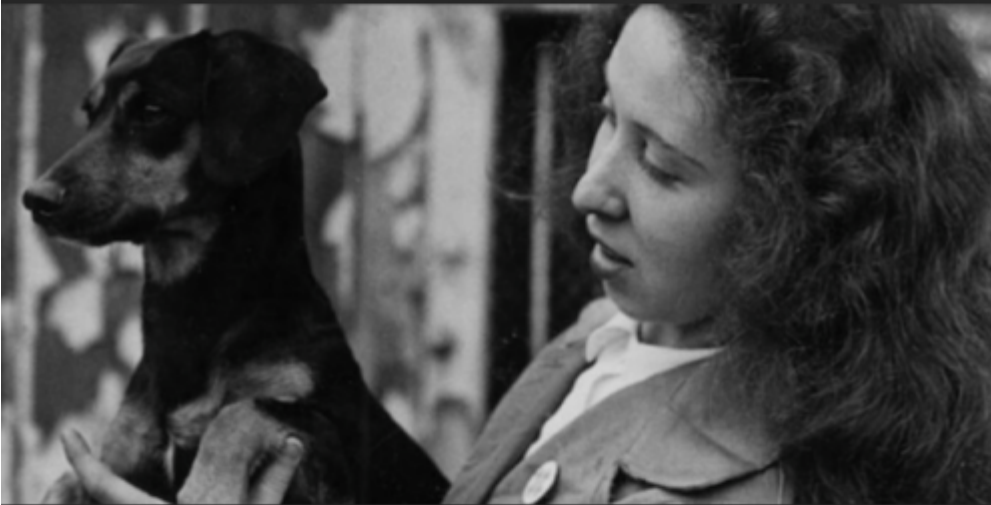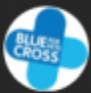

**Blue Cross**  @The\_Blue\_Cross · 5d 

To help servicemen bring dogs back from overseas, our boarding kennels in Blackheath, London, were used for quarantine purposes.

...

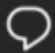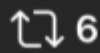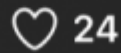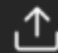

Tweet your reply

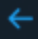

Tweet

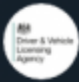

DVLA

@DVLAGovuk

! We're clamping untaxed vehicles in #London and #Leicester today. If your vehicle isn't taxed, do it now: ↪

↪ gov.uk/dvla/taxyourve...

#TaxItOrLosIt

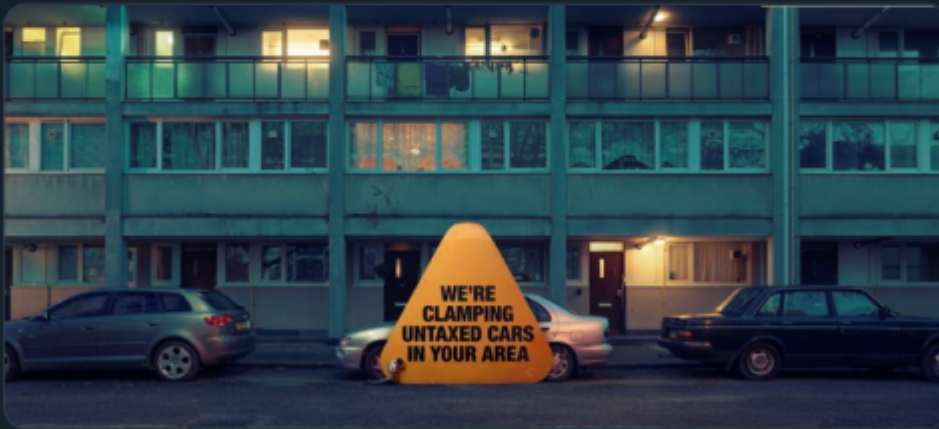

4:17 PM · Feb 19, 2020 · Salesforce - Social Studio

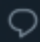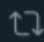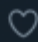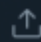



CARRYING A  
KNIFE  
HAS CONSEQUENCES

**Carrying a knife can  
result in your own death.**

**You are 3 times more likely to be  
stabbed if you go out carrying a  
knife.**

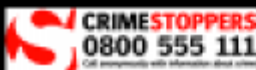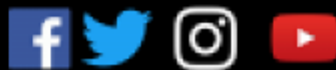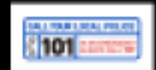

CARRYING A  
KNIFE  
HAS CONSEQUENCES

**Carrying a knife can have devastating consequences on your friends and family.**

**No parent or grandparent would ever want to see their child get injured or be killed.**

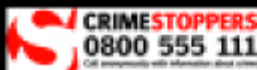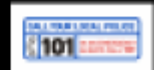

Supplement: sj-pdf-1-jiv-10.1177_08862605211064237.pdf [file sj-pdf-1-jiv-10.1177_08862605211064237.pdf]
